# Supplementary material for: Short-term effect on pain and function of neurophysiological education and sensorimotor retraining compared to usual physiotherapy in patients with chronic or recurrent non-specific low back pain, a pilot randomized controlled trial
Source: Springer Nature journal article supplement (doi:10.1186/s12891-015-0533-2), 2015-04-09
Supplement: MOESM1 [file 9752278]

**Additional file 1: Content of sessions and home assignments of multimodal treatment**

| <b>Week</b> | <b>Content</b>                                                                                                                                                                                                                                                                                                          | <b>Assignment (HTI* (5 assignments per week))</b>                                                                                                                                                                                                                 |
|-------------|-------------------------------------------------------------------------------------------------------------------------------------------------------------------------------------------------------------------------------------------------------------------------------------------------------------------------|-------------------------------------------------------------------------------------------------------------------------------------------------------------------------------------------------------------------------------------------------------------------|
| 1           | <ul style="list-style-type: none"> <li>• personal login to the HTI</li> <li>• instruction on HTI use for assignments</li> <li>• patients receive the book Explain Pain</li> <li>• neurophysiology of (chronic) back pain</li> <li>• local trunk muscle recruitment, dissociation exercises, movement control</li> </ul> | <ul style="list-style-type: none"> <li>• reading section of the book Explain Pain</li> <li>• answer 18 questions related to the section read</li> <li>• movement control exercise, frequency and duration reported in HTI</li> </ul>                              |
| 2           | <ul style="list-style-type: none"> <li>• neurophysiology of pain</li> <li>• movement control exercises</li> <li>• instruction on left-right recognition training with the Recognise® program</li> </ul>                                                                                                                 | <ul style="list-style-type: none"> <li>• similar to previous week</li> <li>• left-right recognition training with 3 x 20 pictures of trunk positions</li> </ul>                                                                                                   |
| 3           | <ul style="list-style-type: none"> <li>• instruction on SRT</li> <li>• neurophysiology of pain and analysis of patient's individual situation</li> <li>• purpose of SRLM explained with video</li> <li>• movement control exercises</li> </ul>                                                                          | <ul style="list-style-type: none"> <li>• perform SRT on HTI (3 x 40 two numbered dots to discern)</li> <li>• watching video with SRLM (linked on HTI)</li> <li>• movement control exercise, frequency and duration reported in HTI</li> </ul>                     |
| 4           | <ul style="list-style-type: none"> <li>• education on the application of movement control into daily living</li> <li>• graded exposure to functional movement</li> </ul>                                                                                                                                                | <ul style="list-style-type: none"> <li>• perform SRT on HTI (3 x 40 numbered dots)</li> <li>• perform 3 x 20 images on Recognise®</li> <li>• movement control exercise, frequency and duration reported in HTI</li> </ul>                                         |
| 5           | <ul style="list-style-type: none"> <li>• analysis of everyday movements, discussion of experienced limitations, finding better movement strategies</li> </ul>                                                                                                                                                           | <ul style="list-style-type: none"> <li>• perform SRT on HTI (1 x 40 letters to perceive)</li> <li>• watching video with SRLM</li> <li>• movement control exercise, frequency and duration reported in HTI</li> </ul>                                              |
| 6           | <ul style="list-style-type: none"> <li>• as in previous session</li> <li>• emphasis on individual resources and recreation</li> </ul>                                                                                                                                                                                   | <ul style="list-style-type: none"> <li>• perform SRT on HTI (1 x 30 3-letter-words to perceive)</li> <li>• watching video with FRLM</li> <li>• movement control exercise, frequency and duration reported in HTI</li> </ul>                                       |
| 7           | <ul style="list-style-type: none"> <li>• as in previous session</li> </ul>                                                                                                                                                                                                                                              | <ul style="list-style-type: none"> <li>• perform SRT on HTI (3 x 40 numbered dots)</li> <li>• watching video with FRLM</li> <li>• movement control exercise, frequency and duration reported in HTI</li> </ul>                                                    |
| 8           | <ul style="list-style-type: none"> <li>• wrap-up of acquired knowledge, newly integrated movement behaviour and handling of pain exacerbations in the future</li> </ul>                                                                                                                                                 | <ul style="list-style-type: none"> <li>• reading a summary of the key points of the programme, including application to everyday life</li> <li>• watching video with FRLM</li> <li>• movement control exercise, frequency and duration reported in HTI</li> </ul> |

HTI web-based home training interface; SRT Sensory Retraining Tool (discerning numbered dots, pressed on patient's back); SRLM small range lumbar movement (to observe and perform, such as in a gymnastic tutorial video); FRLM full range lumbar movement.
