# Supplementary material for: Short-term effect on pain and function of neurophysiological education and sensorimotor retraining compared to usual physiotherapy in patients with chronic or recurrent non-specific low back pain, a pilot randomized controlled trial
Source: Springer Nature journal article supplement (doi:10.1186/s12891-015-0533-2), 2015-04-09
Supplement: MOESM2 [file 9752278]

## **Additional file 2: Recruitment sources**

---

|                                                         |   |
|---------------------------------------------------------|---|
| Regularly referred to the study practice                | 9 |
| Mailing to employees by company                         | 9 |
| Newspaper advertisement                                 | 5 |
| University sports website                               | 3 |
| Flyer on notice board in supermarket and fitness centre | 2 |
