# Supplementary material for: Short-term effect on pain and function of neurophysiological education and sensorimotor retraining compared to usual physiotherapy in patients with chronic or recurrent non-specific low back pain, a pilot randomized controlled trial
Source: Springer Nature journal article supplement (doi:10.1186/s12891-015-0533-2), 2015-04-09
Supplement: MOESM3 [file 9752278]

### Additional file 3: Online eligibility testing

---

| <b>Persons contacting online recruitment homepage: 372</b>                                          | <b>Reasons for exclusion (-n)</b>          |
|-----------------------------------------------------------------------------------------------------|--------------------------------------------|
| Paralysis on one or both lower limbs                                                                | -60                                        |
| Not having an aid that helps with home assignments over 5 weeks, 15 minutes, five times a week      | -41                                        |
| Suffering from LBP less than 3 months                                                               | -19                                        |
| Intra-articular or perineural steroid injection on the lumbar spine during the previous five months | -17                                        |
| Surgery on the lumbar spine within the last 2 years                                                 | -13                                        |
| Age < 18 or > 60                                                                                    | -11                                        |
| History of fracture of the lumbar spine                                                             | -4                                         |
| Pregnancy or >5 months postpartum                                                                   | -3                                         |
| Not capable of reading and speaking German                                                          | -3                                         |
| Contraindication to physical exercise                                                               | -2                                         |
| No home access to the internet                                                                      | -1                                         |
| Less than 5 points on the RMDQ                                                                      | -84                                        |
| Less than 4 points on the KSBT                                                                      | -78                                        |
| Not inclined to participate after detailed explication about the program                            | -8                                         |
|                                                                                                     | 28 included after signing informed consent |
