# Supplementary material for: Short-term effect on pain and function of neurophysiological education and sensorimotor retraining compared to usual physiotherapy in patients with chronic or recurrent non-specific low back pain, a pilot randomized controlled trial
Source: Springer Nature journal article supplement (doi:10.1186/s12891-015-0533-2), 2015-04-09
Supplement: MOESM4 [file 9752278]

**Additional file 4: MMT Patients satisfaction with treatment**

|                                                                                                                                   | Frequency of answers (total 14) |                                 |                              |            |                     | Missing data |
|-----------------------------------------------------------------------------------------------------------------------------------|---------------------------------|---------------------------------|------------------------------|------------|---------------------|--------------|
|                                                                                                                                   | 1 strongly agree                | 2 agree                         | 3 neither agree nor disagree | 4 disagree | 5 strongly disagree |              |
| <b>Achieved outcome</b>                                                                                                           |                                 |                                 |                              |            |                     |              |
| I'm satisfied with the achieved outcome                                                                                           | 7                               | 4<br>1 wd/t<br>1 wd/c<br>1 wd/i |                              |            |                     |              |
| I reached the conjointly pre-assigned aims                                                                                        | 8                               | 3<br>1 wd/t<br>1 wd/c           |                              |            |                     | 1 m/i        |
| <b>Neurophysiological education</b>                                                                                               |                                 |                                 |                              |            |                     |              |
| The length of the chapters to read in the book Explain Pain was o.k. for me                                                       | 8                               | 3<br>1 wd/t<br>1 wd/c           | 1 wd/i                       |            |                     |              |
| The content of the chapters to read in the book Explain Pain was comprehensible for me                                            | 6                               | 4<br>1 wd/i                     | 1<br>1 wd/t<br>1 wd/c        |            |                     |              |
| The amount of questions to answer according to the read chapters was o.k. for me                                                  | 6                               | 3<br>1 wd/t<br>1 wd/c           | 2                            | 1 wd/i     |                     |              |
| The level of difficulty of the questions to answer according to the read chapters was o.k. for me                                 | 5                               | 4<br>1 wd/c                     | 2<br>1 wd/t                  | 1 wd/i     |                     |              |
| The appliance of the home training interface (HTI) (what chapter to read, how to fill in the questions) was comprehensible for me | 8<br>1 wd/t                     | 2<br>1 wd/c                     | 2                            | 1 wd/i     |                     |              |
| The content of the therapy sessions according to neurophysiology education was comprehensible for me                              | 7<br>1 wd/t                     | 3<br>1 wd/c                     | 1                            |            |                     | 1 wd/i       |
| The content of the written chapters in the book Explain Pain and the relevant questions were helpful                              | 5                               | 5<br>1 wd/c                     | 1<br>1 wd/t                  |            |                     | 1 wd/i       |
| The content of the therapy sessions according to neurophysiology education was helpful                                            | 7                               | 4<br>1 wd/c                     | 1 wd/t                       |            |                     | 1 wd/i       |
| <b>Sensory retraining with Sensory Retraining Tool (SRT), discerning numbered dots</b>                                            |                                 |                                 |                              |            |                     |              |
| The expenditure of time to execute the SRT was o.k. for me                                                                        | 3                               | 7<br>1 wd/c                     | 1<br>1 wd/i                  |            | 1 wd/t              |              |
| The expenditure of time to execute the SRT was o.k. for my aid person                                                             | 2                               | 4                               | 3<br>1 wd/c<br>1 wd/i        | 1          | 1 wd/t              |              |
| The procedure how to apply the SRT was comprehensible for me                                                                      | 6<br>1 wd/t                     | 5<br>1 wd/c                     |                              | 1 wd/i     |                     |              |

|                                                                                                      |                                                                                                                                                                                                                                                                                                                                                                                                                                                 |                       |                       |   |  |                  |
|------------------------------------------------------------------------------------------------------|-------------------------------------------------------------------------------------------------------------------------------------------------------------------------------------------------------------------------------------------------------------------------------------------------------------------------------------------------------------------------------------------------------------------------------------------------|-----------------------|-----------------------|---|--|------------------|
| The whole purpose of the SRT was comprehensible for me                                               | 7<br>1 wd/t                                                                                                                                                                                                                                                                                                                                                                                                                                     | 4<br>1 wd/c<br>1 wd/i |                       |   |  |                  |
| The execution of the SRT did help me                                                                 | 4                                                                                                                                                                                                                                                                                                                                                                                                                                               | 6<br>1 wd/c<br>1 wd/i | 1<br>1 wd/t           |   |  |                  |
| <b>Sensory retraining with Sensory Retraining Tool (SRT), single letters and three-letter-words</b>  |                                                                                                                                                                                                                                                                                                                                                                                                                                                 |                       |                       |   |  |                  |
| The expenditure of time to execute the SRT was o.k. for me                                           | 5                                                                                                                                                                                                                                                                                                                                                                                                                                               | 5                     | 1<br>1 wd/c           |   |  | 1 wd/t<br>1 wd/i |
| The expenditure of time to execute the SRT was o.k. for my aid person                                | 4                                                                                                                                                                                                                                                                                                                                                                                                                                               | 2                     | 4<br>1 wd/c           | 1 |  | 1 wd/t<br>1 wd/i |
| The procedure how to apply the SRT was comprehensible for me                                         | 9                                                                                                                                                                                                                                                                                                                                                                                                                                               | 2<br>1 wd/c           |                       |   |  | 1 wd/t<br>1 wd/i |
| The whole purpose of the SRT was comprehensible for me                                               | 9                                                                                                                                                                                                                                                                                                                                                                                                                                               | 2<br>1 wd/c           |                       |   |  | 1 wd/t<br>1 wd/i |
| The execution of the SRT did help me                                                                 | 5                                                                                                                                                                                                                                                                                                                                                                                                                                               | 5<br>1 wd/c           | 1                     |   |  | 1 wd/t<br>1 wd/i |
| <b>Determination of perspective of pictures of the trunk on Recognise® Software</b>                  |                                                                                                                                                                                                                                                                                                                                                                                                                                                 |                       |                       |   |  |                  |
| The preceding information on how to apply Recognise® was comprehensible for me                       | 9<br>1 wd/t                                                                                                                                                                                                                                                                                                                                                                                                                                     | 2<br>1 wd/c<br>1 wd/i |                       |   |  |                  |
| The expenditure of time to execute the Recognise® home training was o.k. for me                      | 8<br>1 wd/t                                                                                                                                                                                                                                                                                                                                                                                                                                     | 2                     | 1<br>1 wd/c<br>1 wd/i |   |  |                  |
| The whole purpose of the Recognise® home training was comprehensible for me                          | 8<br>1 wd/t                                                                                                                                                                                                                                                                                                                                                                                                                                     | 3<br>1 wd/c<br>1 wd/i |                       |   |  |                  |
| The Recognise® home training did help me                                                             | 4                                                                                                                                                                                                                                                                                                                                                                                                                                               | 6<br>1 wd/t<br>1 wd/c | 1<br>1 wd/i           |   |  |                  |
| <b>Video small range lumbar movements (SRLM)</b>                                                     |                                                                                                                                                                                                                                                                                                                                                                                                                                                 |                       |                       |   |  |                  |
| The preceding information, what to do when watching the SLRM-video at home was comprehensible for me | 8<br>1 wd/t                                                                                                                                                                                                                                                                                                                                                                                                                                     | 2<br>1 wd/c<br>1 wd/i | 1                     |   |  |                  |
| <b>Video full range lumbar movements (FRLM)</b>                                                      |                                                                                                                                                                                                                                                                                                                                                                                                                                                 |                       |                       |   |  |                  |
| The preceding information, what to do when watching the FRLM-video at home was comprehensible for me | 8                                                                                                                                                                                                                                                                                                                                                                                                                                               | 2<br>1 wd/c           | 1                     |   |  | 1 wd/t<br>1 wd/i |
| <b>Open questions</b>                                                                                |                                                                                                                                                                                                                                                                                                                                                                                                                                                 |                       |                       |   |  |                  |
| What helped me most                                                                                  | 'intentional change of posture'; 'improvement of body-awareness'; 'reading the book, therapist who showed me motor control exercises and supervised me'; 'motor control exercises and sensory retraining 1 wd/t'; 'the newly acquired knowledge that pain is no physical sensation but triggered from within the brain'; 'combination of SRT with aid and knowledge from the book'; 'the book and motor control exercises 1 wd/c'; 'reading the |                       |                       |   |  | 1 wd/t           |

|                       |                                                                                                                                                                                                                                                                                                                                                                                                                                                                                      |        |
|-----------------------|--------------------------------------------------------------------------------------------------------------------------------------------------------------------------------------------------------------------------------------------------------------------------------------------------------------------------------------------------------------------------------------------------------------------------------------------------------------------------------------|--------|
|                       | book, therapy sessions'; 'explanations of therapist, supervision of motor control exercises to change bad movement patterns'; 'knowledge about conduction of pain'; 'motor control exercises to change bad movement patterns, learning selective movement'; 'reading the book'; 'performing motor control exercises regularly, for example how to get out of my car without pain';                                                                                                   |        |
| What helped me least  | 'don't know, eventually the SRT'; 'recognise'; ' video S/FRLM'; 'reading the book 1 wd/t'; 'eventually watching the video'; 'SRT 1 wd/c'; 'SRT'; 'video S/FRLM'; 'recognise'; 'all together helped, the combination was the key'; 'SRT';                                                                                                                                                                                                                                             | 1 wd/i |
| What I liked least    | 'SRT'; 'executing the 3 <sup>rd</sup> time in a row the STR (numbers)'; 'SRT numbers'; 'reading the book and answering questions 1 wd/t'; 'the SRT numbers'; 'to persuade my aid to help me for the SRT'; 'SRT 1 wd/c'; 'SRT'; 'video S/FRLM'; SRT'; 'motor control exercises'; 'SRT letters'; 'nothing, maybe the lengthy stories in the book';                                                                                                                                     | 1 wd/i |
| What I liked the most | 'recognise'; 'active exercises for motor retraining'; 'SRT letters, motor control exercises, reading the book'; 'video SRLM and performing exercises simultaneously 1 wd/t'; 'the SRT letters'; 'the diversity and alternation of interventions'; 'motor control exercises 1 wd/c'; 'reading the book'; 'motor control exercises at home'; 'motor control exercises'; 'recognise'; 'motor control exercises'; 'practising motor control movements during the physiotherapy sessions' | 1 do/i |

1 wd/t: one early withdrawal after 7th week: aid person couldn't afford time to help the subject to execute the SRT. 1 wd/c: one early withdrawal after 4th week because inappropriate and misleading use of the home training interface. 1 wd/i: one early withdrawal after the 6th week because of software problems with the home training to run on android system
